# Supplementary material
Source: Springer Nature journal article supplement (https://www.springermedizin.de/resource/supplementary/12936_2012_2197_MOESM2_ESM.pdf/9542640)
Supplement: MOESM2 [file 9542640]

**Additional file 2.** Matched comparisons of antibody levels and cytokine and chemokine concentrations in children with different severe malaria clinical presentations.

| Parameter                                                                  | Severe anaemia (N=22 pairs) |       | ARD (N=34 pairs)        |       | Prostration (N=50 pairs) |       | Multiple seizures (N=19 pairs) |       |
|----------------------------------------------------------------------------|-----------------------------|-------|-------------------------|-------|--------------------------|-------|--------------------------------|-------|
|                                                                            | Matched comparison          | P     | Matched comparison      | P     | Matched comparison       | P     | Matched comparison             | P     |
| <b>IgG, normalized OD</b>                                                  |                             |       |                         |       |                          |       |                                |       |
| MSP-1                                                                      | -0.1 (-0.4 – 0.3)           | 0.532 | 0.1 (-0.5 – 0.3)        | 1.000 | -0.1(-0.5 – 0.3)         | 0.323 | 0 (-0.1 – 0.2)                 | 1.000 |
| EBA-175                                                                    | -0.1 (-0.2 – 0.2)           | 0.539 | -0.03 (-0.3 – 0.5)      | 0.612 | -0.1 (-0.3 – 0.4)        | 0.194 | 0.1 (-0.2 – 0.8)               | 1.000 |
| AMA-1                                                                      | -0.1 (-0.6 – 0.5)           | 0.823 | 0.1 (-0.4 – 0.4)        | 0.629 | -0.1 (-0.4 – 0.3)        | 0.491 | -0.2 (-0.3 – 0.04)             | 0.175 |
| DBL $\alpha$                                                               | -0.04 (-0.1 – 0.0)          | 0.031 | -0.03 (-0.1 – 0.02)     | 0.015 | -0.03 (-0.1 – 0.02)      | 0.002 | -0.03 (-0.1 – 0.03)            | 0.256 |
| <i>Pf</i> lysate                                                           | 0.01 (-0.01 – 0.1)          | 0.120 | 0.03 (-0.01 – 0.1)      | 0.003 | 0.02 (-0.01 – 0.1)       | 0.004 | 0.03 (0 – 0.1)                 | 0.060 |
| <b>IgM, normalized OD</b>                                                  |                             |       |                         |       |                          |       |                                |       |
| MSP-1                                                                      | -0.2 (-0.5 – 0.1)           | 0.066 | -0.2 (-0.6 – 0.1)       | 0.217 | -0.2 (-0.5 – 0.1)        | 0.013 | -0.2 (-0.4 – 0.1)              | 0.641 |
| EBA-175                                                                    | -0.1 (-0.5 – 0.02)          | 0.055 | -0.1 (-0.4 – 0.1)       | 0.058 | -0.1 (-0.4 – 0.2)        | 0.186 | 0.03 (-0.3 – 0.2)              | 1.000 |
| AMA-1                                                                      | -0.3 (-0.6 - -0.03)         | 0.004 | -0.1 (-0.5 – 0.2)       | 0.049 | -0.1 (-0.4 – 0.1)        | 0.016 | 0.03 (-0.5 – 0.2)              | 1.000 |
| DBL $\alpha$                                                               | -0.1 (-0.3 – 0.2)           | 0.524 | -0.1 (-0.4 – 0.1)       | 0.228 | -0.1 (-0.3 – 0.1)        | 0.060 | -0.1 (-0.4 – 0.3)              | 1.000 |
| <i>Pf</i> lysate                                                           | 0.01 (-0.1 – 0.04)          | 0.815 | 0.01 (-0.1 – 0.04)      | 0.230 | 0 (-0.1 – 0.04)          | 0.893 | 0 (-0.1 – 0.04)                | 0.677 |
| <b>Cytokines and chemokines, pg/mL (TGF- <math>\beta</math>1 in ng/mL)</b> |                             |       |                         |       |                          |       |                                |       |
| IL-12p70                                                                   | -0.2 (-48.6 – 16.4)         | 0.648 | 0 (-22.0 – 16.9)        | 0.693 | -0.8 (-25.2 – 12.5)      | 0.149 | 0 (-24.3 – 12.5)               | 0.807 |
| IL-2                                                                       | 0 (-33.9- 13.7)             | 0.801 | 0 (-14.6 – 10.8)        | 1.000 | 0 (-19.5 – 10.8)         | 0.613 | 0 (-14.6 – 10.8)               | 0.596 |
| IFN- $\gamma$                                                              | -9.4 (-40.7 – 4.7)          | 0.134 | -4.1 (-20.3 – 10.1)     | 0.150 | -0.1 (-21.0 – 17.2)      | 1.000 | 1.0 (-10.4 – 80.3)             | 0.829 |
| IL-4                                                                       | -1.2 (-55.6 – 18.5)         | 0.822 | 0 (-29.2 – 18.5)        | 0.644 | 0 (-25.1 – 17.7)         | 0.755 | 0 (-2.4 – 12.2)                | 0.784 |
| IL-10                                                                      | -61.2 (-1608.2 – 737.7)     | 1.000 | 385.2 (-176.8 – 2492.4) | 0.032 | 151.2 (-672.9 – 1968.4)  | 0.185 | 348.5 (-247.9 – 3034.1)        | 0.073 |
| IL-8                                                                       | 3.8 (-38.0 – 40.4)          | 0.510 | 41.4 (-23.1 – 122.0)    | 0.058 | 21 (-36.4 – 87.9)        | 0.174 | 10.0 (-32.8 – 162.5)           | 0.633 |
| IL-6                                                                       | 9.7 (-119.1 – 154.4)        | 0.507 | 69.5 (-6.3 – 506.6)     | 0.002 | 16.1 (-61.0 – 285.7)     | 0.179 | 127.1 (-15.0 – 552.9)          | 0.070 |
| IL-1 $\beta$                                                               | -0.8 (-30.7 – 9.3)          | 0.834 | 4.3 (-23.4 – 14.9)      | 0.214 | 1.2 (-16.1 – 14.9)       | 0.581 | 1.7 (-1.3 – 14.9)              | 0.152 |
| TNF                                                                        | 0 (-13.8 – 12.7)            | 1.000 | 1.9 (-9.6 – 24.8)       | 0.725 | 0 (-12.1 – 12.7)         | 0.509 | 0 (-8.0 – 0)                   | 0.075 |
| TGF- $\beta$ 1                                                             | -106.6 (-237.1 – 19.0)      | 0.134 | -144.2 (-356.4 – 11.9)  | 0.002 | -158.1 (-356.4- 59.2)    | 0.007 | -132.3 (-272.9 – 59.2)         | 0.166 |

ARD, acidosis and/or respiratory distress; OD, optical density at 492 nm; *Pf*, *Plasmodium falciparum*.

Data reports the median difference (inter-quartile range) of antibody levels or cytokine and chemokine concentrations between paired children with SM and UM. *P*-values were calculated using Sign test. All comparisons were corrected by the Monte Carlo permutation test (1000 random permutations).
